# Supplementary material for: A highly efficient nano-sized Cu2O/SiO2egg-shell catalyst for C–C coupling reactions
Source: Royal Society of Chemistry journal article supplement (doi:10.1039/c7ra13490h), 2018-01-01
Supplement: c7ra13490h1.pdf [file c7ra13490h1.pdf]

## Supporting Information

### **A Highly Efficient Nano-Sized Cu<sub>2</sub>O/SiO<sub>2</sub> Egg-Shell Catalyst for C-C Coupling Reactions**

**Soohee Kim,<sup>a</sup> Shin Wook Kang,<sup>b</sup> Ji Chan Park,<sup>\*b</sup> Kang Hyun Park<sup>\*a</sup>**

<sup>a</sup> Department of Chemistry and Chemistry Institute for Functional Materials, Pusan National University, Busan 609-735, Korea.

Phone: (+82)-51-510-2238; Fax: (+82)-51-980-5200; e-mail: chemistry@pusan.ac.kr

<sup>b</sup> Clean Fuel Laboratory, Korea Institute of Energy Research, Daejeon, 305-343, Korea. e-mail: jcpark@kier.re.kr

| Entry | Solvent<br>(2 ml) | Conv. (%) | Select. (%) |
|-------|-------------------|-----------|-------------|
| 1     | Toluene           | 84        | 99          |
| 2     | THF               | 3         | 100         |
| 3     | DMF               | 19        | 0           |
| 4     | neat              | 100       | 99          |

Reaction conditions: phenylacetylene (0.50 mmol), benzoyl chloride (0.75 mmol), base Et<sub>3</sub>N (4.0 equiv.), cat. 1 mol% SiO<sub>2</sub>@Cu<sub>2</sub>O/mSiO<sub>2</sub>, 12h, 80 °C, Ar atmosphere. Determined by using gas chromatography-mass spectrometry (GC-MS).

**Table S1** The synthesis of ynones from acyl chlorides and terminal alkynes catalyzed by SiO<sub>2</sub>@Cu<sub>2</sub>O/mSiO<sub>2</sub> under the various solvent system.
